# Supplementary material
Source: PubMed Central journal article supplement (PMC7735671)
Supplement: cb0c00590_si_001.pdf [file cb0c00590_si_001.pdf]

Supporting Information

**Intracellular binding/unbinding kinetics of approved drugs to carbonic anhydrase II observed by in-cell NMR**

Enrico Luchinat<sup>1,2</sup>, Letizia Barbieri<sup>1,3</sup>, Matteo Cremonini<sup>1</sup>, Alessio Nocentini<sup>4</sup>, Claudiu T. Supuran<sup>4,5</sup>,  
Lucia Banci<sup>1,5,\*</sup>

<sup>1</sup> CERM – Magnetic Resonance Center, Università degli Studi di Firenze, Via Luigi Sacconi 6, 50019 Sesto Fiorentino, Italy;

<sup>2</sup> Consorzio per lo Sviluppo dei Sistemi a Grande Interfase – CSGI, Via della Lastruccia 3, 50019 Sesto Fiorentino, Italy;

<sup>3</sup> Consorzio Interuniversitario Risonanze Magnetiche di Metalloproteine, Via Luigi Sacconi 6, Sesto Fiorentino, Italy;

<sup>4</sup> Dipartimento Neurofarba, Sezione di Scienze Farmaceutiche, Università degli Studi di Firenze, Via Ugo Schiff 6, 50019 Sesto Fiorentino, Italy;

<sup>5</sup> Dipartimento di Chimica, Università degli Studi di Firenze, Via della Lastruccia 3, 50019 Sesto Fiorentino, Italy;

\* banci@cerm.unifi.it

Supplementary Figures S1, S2

# Supplementary Figures

## Figure S1

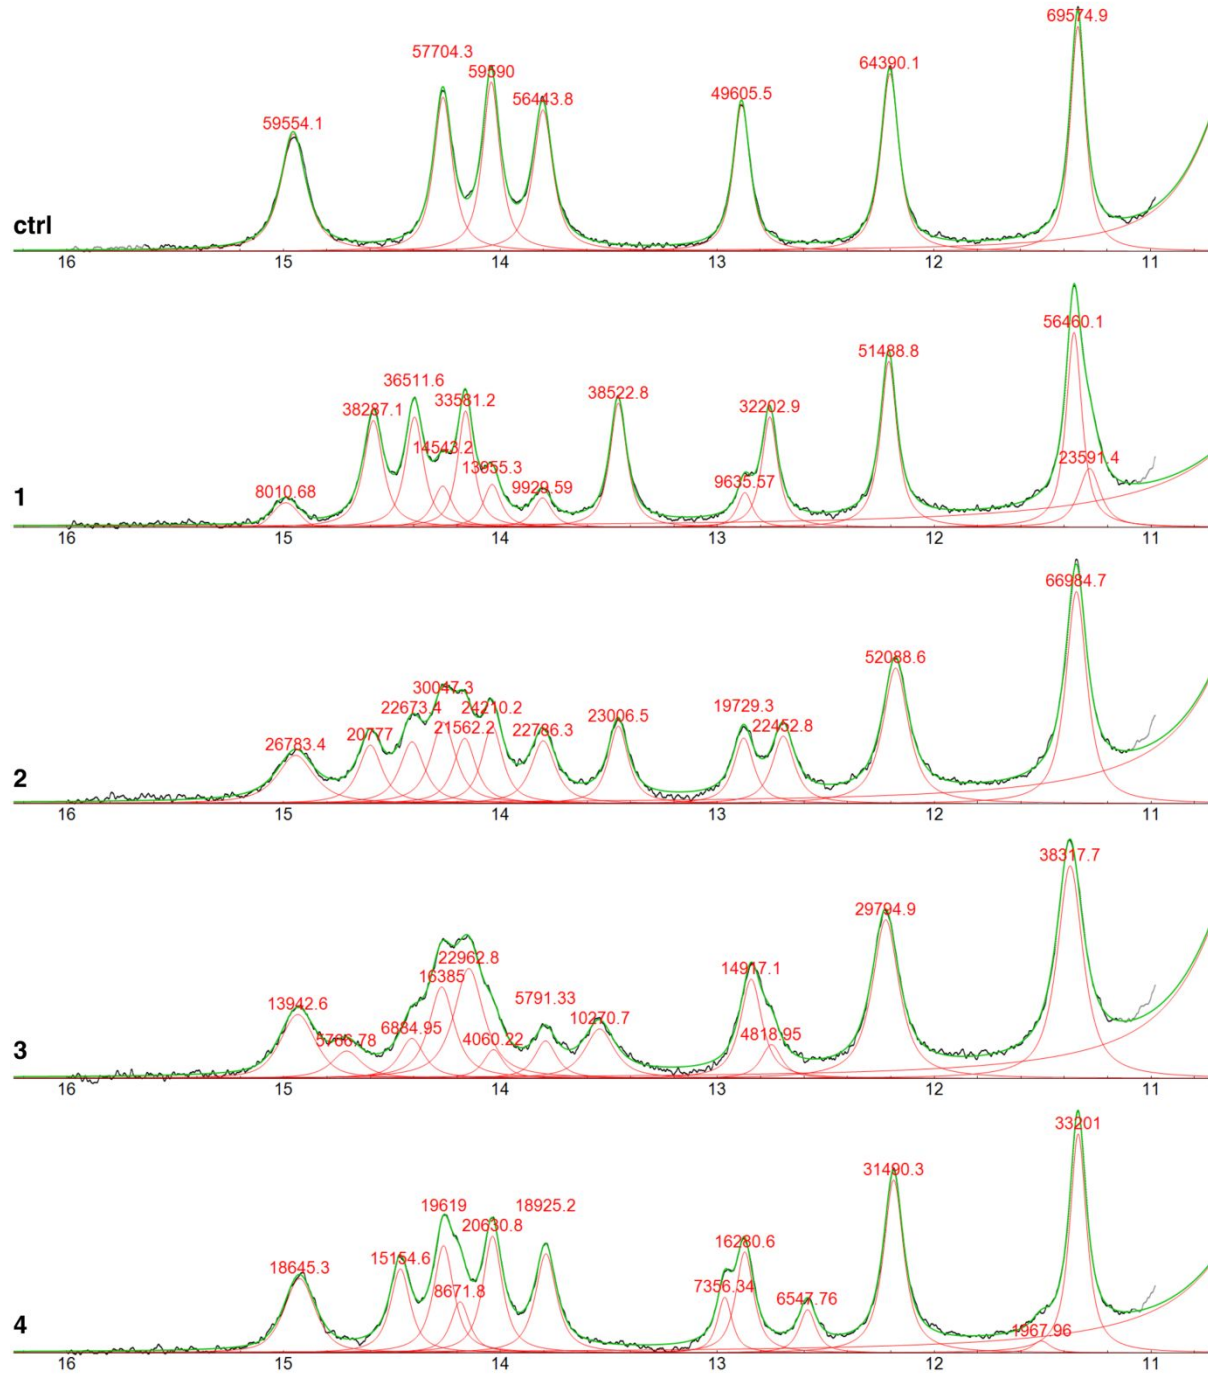

**Figure S1 (cont.)**

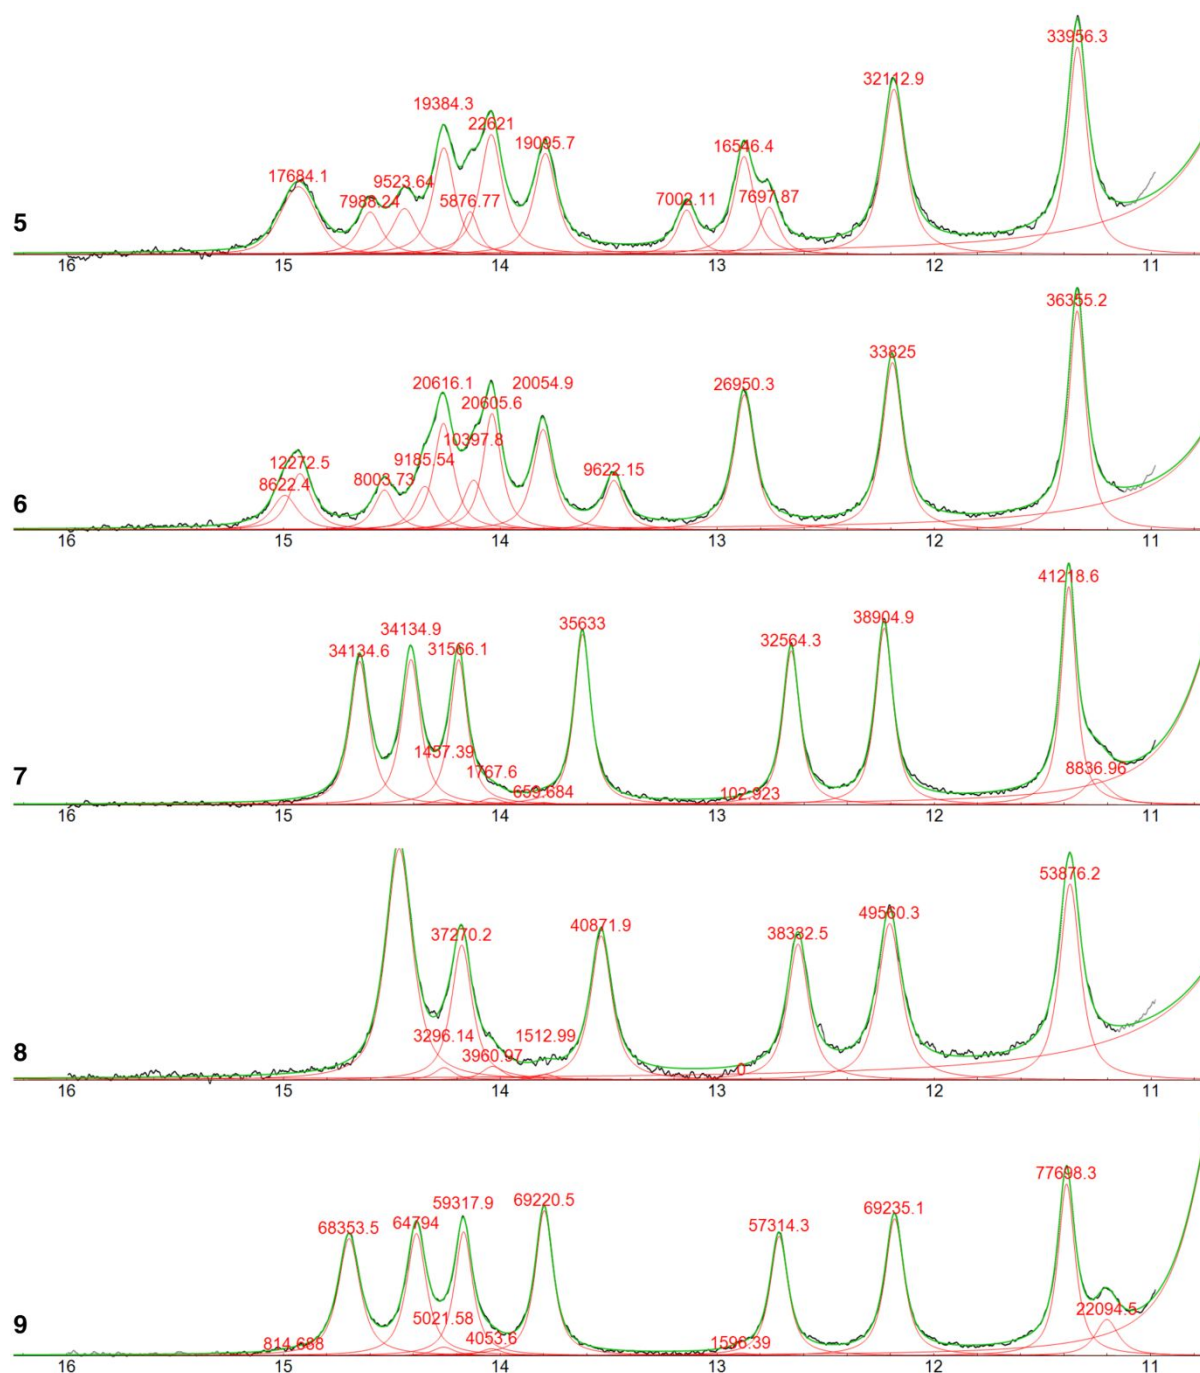

**Figure S1.** Spectral deconvolution in the imino region of 1D  $^1\text{H}$  NMR spectra of cells expressing CA II both untreated (**ctrl**) and treated for 1 hour with 100  $\mu\text{M}$  of each compound (**1-9**). The raw NMR data (black), the Pseudo-Voigt functions of each peak (red) and the overall sum (green) are shown. Peak areas are indicated in red. In some instances, peaks with non-ideal shapes were fitted as the sum of two Pseudo-Voigt functions (e.g. **6**). An additional Pseudo-Voigt function was used to correct for baseline distortion, the area of which was not used in the normalization process.

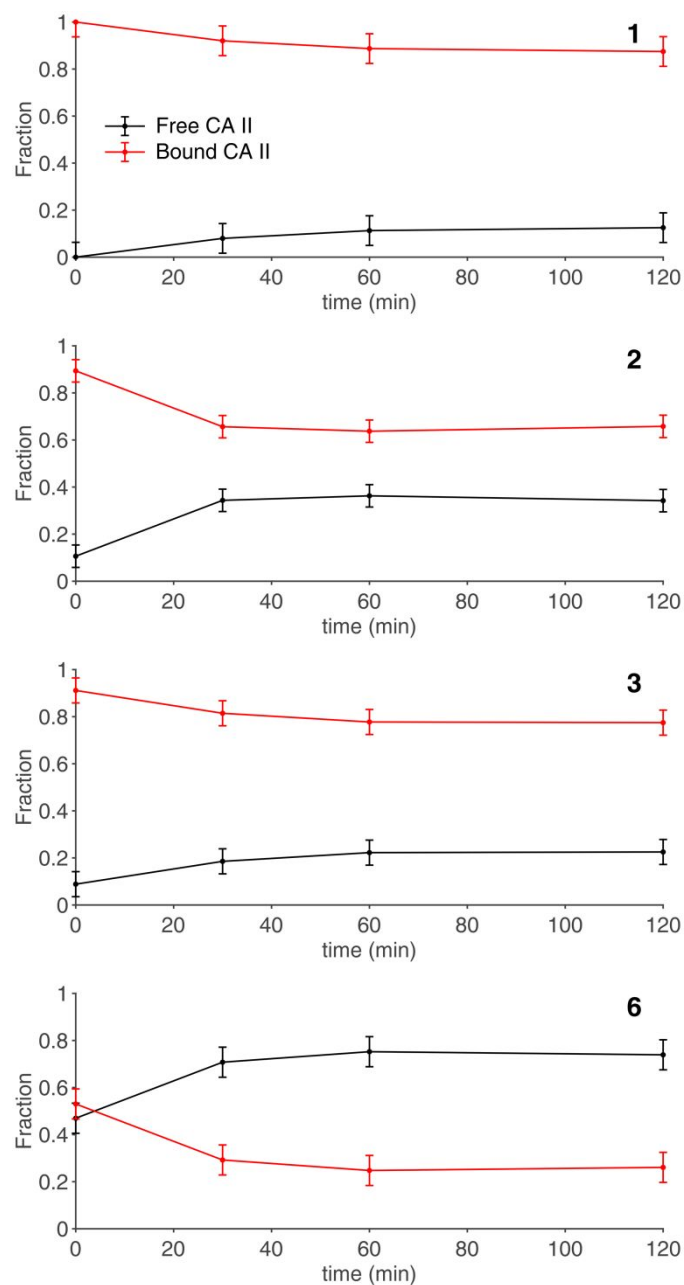

**Figure S2.** Time-dependence of free (black) and bound (red) CA II in cell lysates from cells treated for 1 hour with 100  $\mu$ M of compounds **1-3** and **6** and subsequently washed and incubated in the absence of compound for different times. Error bars were obtained from the MCR-ALS global fitting as follows:  $\text{err} = 2 \times [\text{lack of fit}(\%)]/100$ .
